# Supplementary material
Source: PubMed Central journal article supplement (PMC9748359)
Supplement: mmc1.pdf [file mmc1.pdf]

**Biophysical Journal, Volume 121**

**Supplemental information**

**Programming xenon diffusion in maltose-binding protein**

**Zhuangyu Zhao, Nathan A. Rudman, Jiayi He, and Ivan J. Dmochowski**

# Supporting Information

## Programming xenon diffusion in maltose binding protein

Zhuangyu Zhao, Nathan A. Rudman, Jiayi He, and Ivan J. Dmochowski\*

Department of Chemistry, University of Pennsylvania, Philadelphia, Pennsylvania 19104–6323, United States.

### Table of Contents

|                                                                                               |     |
|-----------------------------------------------------------------------------------------------|-----|
| Figure S1. Fluorescence spectra of K15D and D14K/K15D proteins .....                          | S-2 |
| Figure S2. Salt bridge distance in D14K/K15D.....                                             | S-3 |
| Figure S3. <sup>13</sup> C NMR spectrum of V23A with [1- <sup>13</sup> C]-maltose .....       | S-4 |
| Figure S4. <sup>13</sup> C NMR spectrum of V23L with [1- <sup>13</sup> C]-maltose .....       | S-5 |
| Figure S5. Determination of the Xe dissociation rate in V23A .....                            | S-6 |
| Figure S6. Determination of the Xe dissociation rate in V23L.....                             | S-7 |
| Figure S7. Xe affinity toward the surface of V23A and V23L observed by “Xe flooding” MD ..... | S-8 |
| Table S1. Oligonucleotide primers used in MBP site-directed mutagenesis .....                 | S-9 |

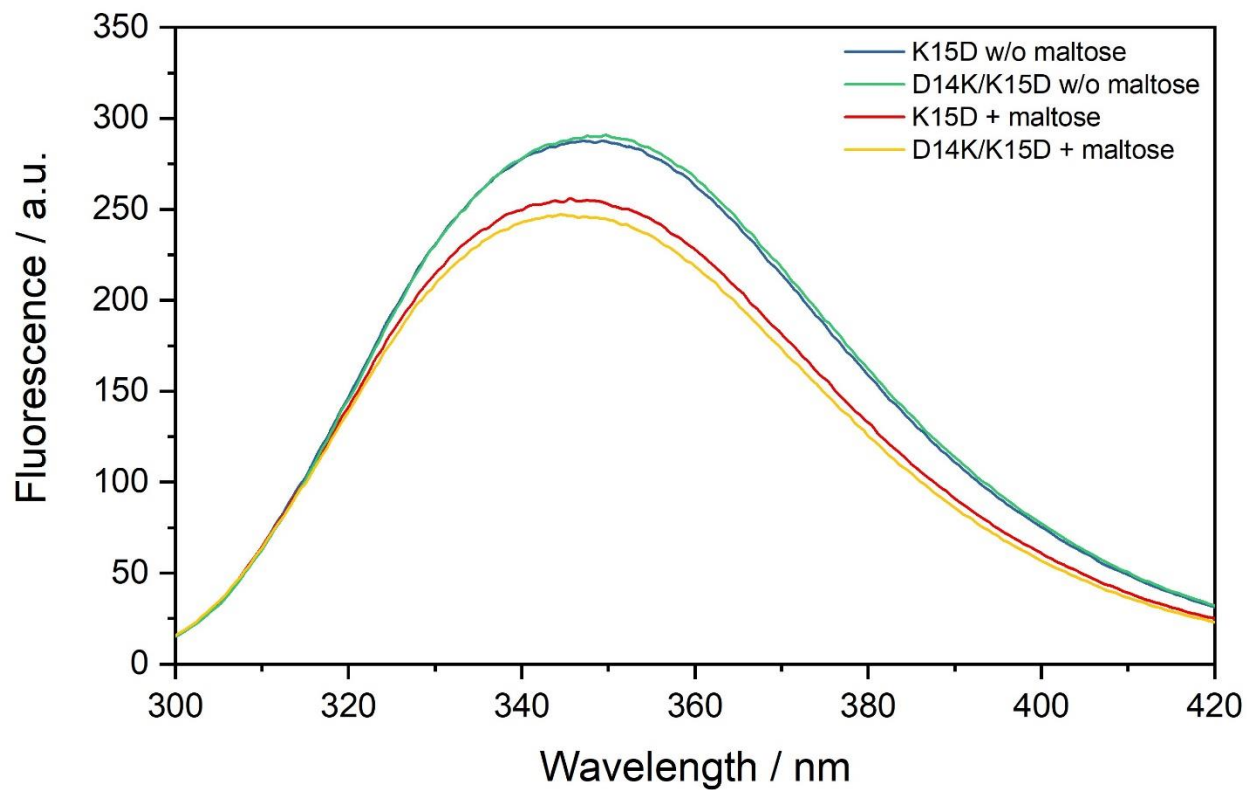

**Figure S1.** Fluorescence spectra of K15D and D14K/K15D proteins in PBS, pH 7.4. Maltose induces 12% and 15% quenching effect on intrinsic fluorescence of K15D and D14K/K15D, respectively.

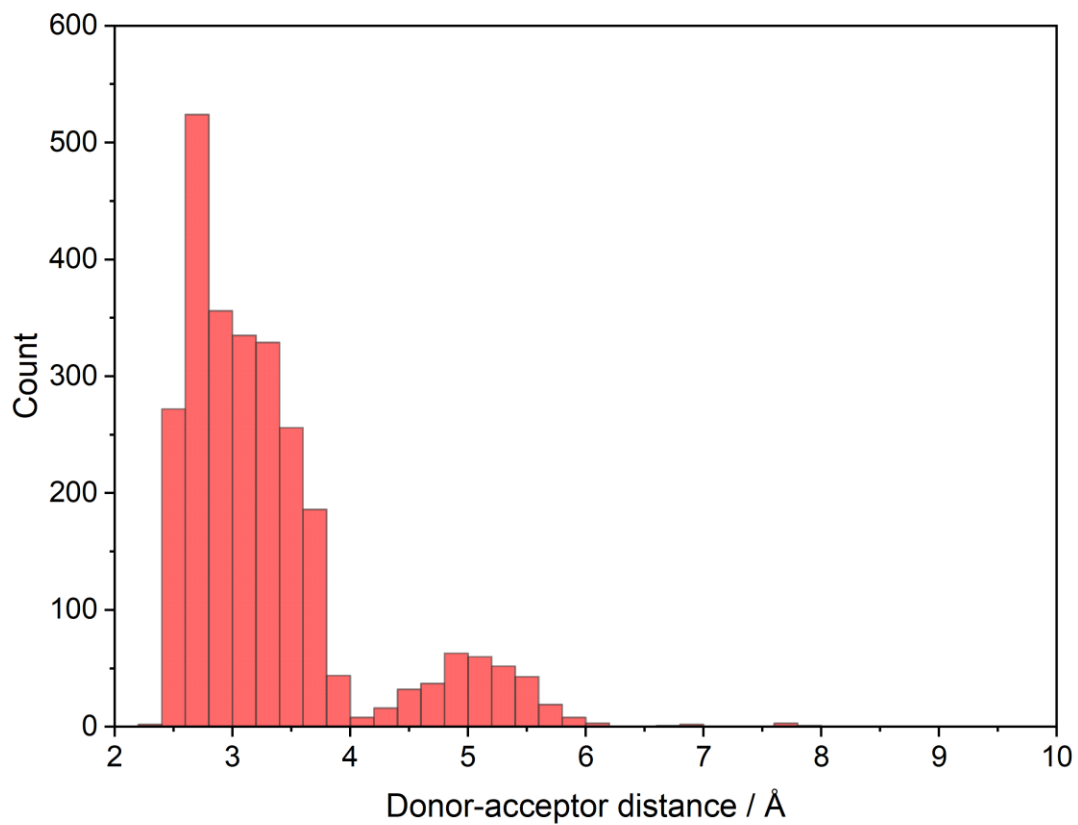

**Figure S2.** Donor-to-acceptor distance between K14 and E111 in the D14K/K15D protein. Salt bridge is defined to exist when the distance is less than 4 Å.

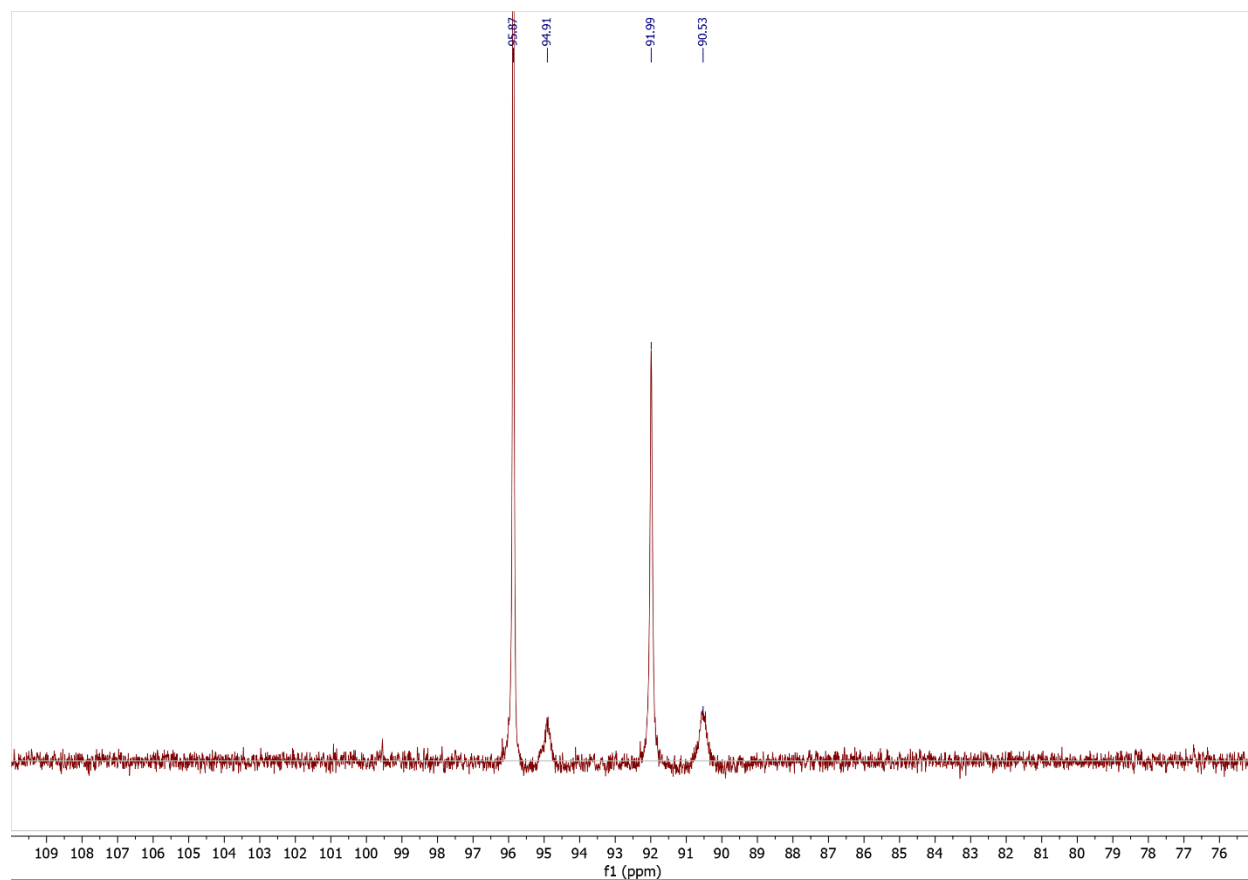

**Figure S3.** <sup>13</sup>C NMR spectrum of 2 mM [1-<sup>13</sup>C]-maltose and 0.6 mM V23A protein in PBS, pH 7.4. From high frequency to low frequency are free β-maltose ( $\delta = 95.87$  ppm), bound β-maltose ( $\delta = 94.91$  ppm), free α-maltose ( $\delta = 91.99$  ppm), and bound α-maltose ( $\delta = 90.53$  ppm). The peak width (FWHM) is 37.8 Hz for bound β-maltose and 37.4 Hz for bound α-maltose.

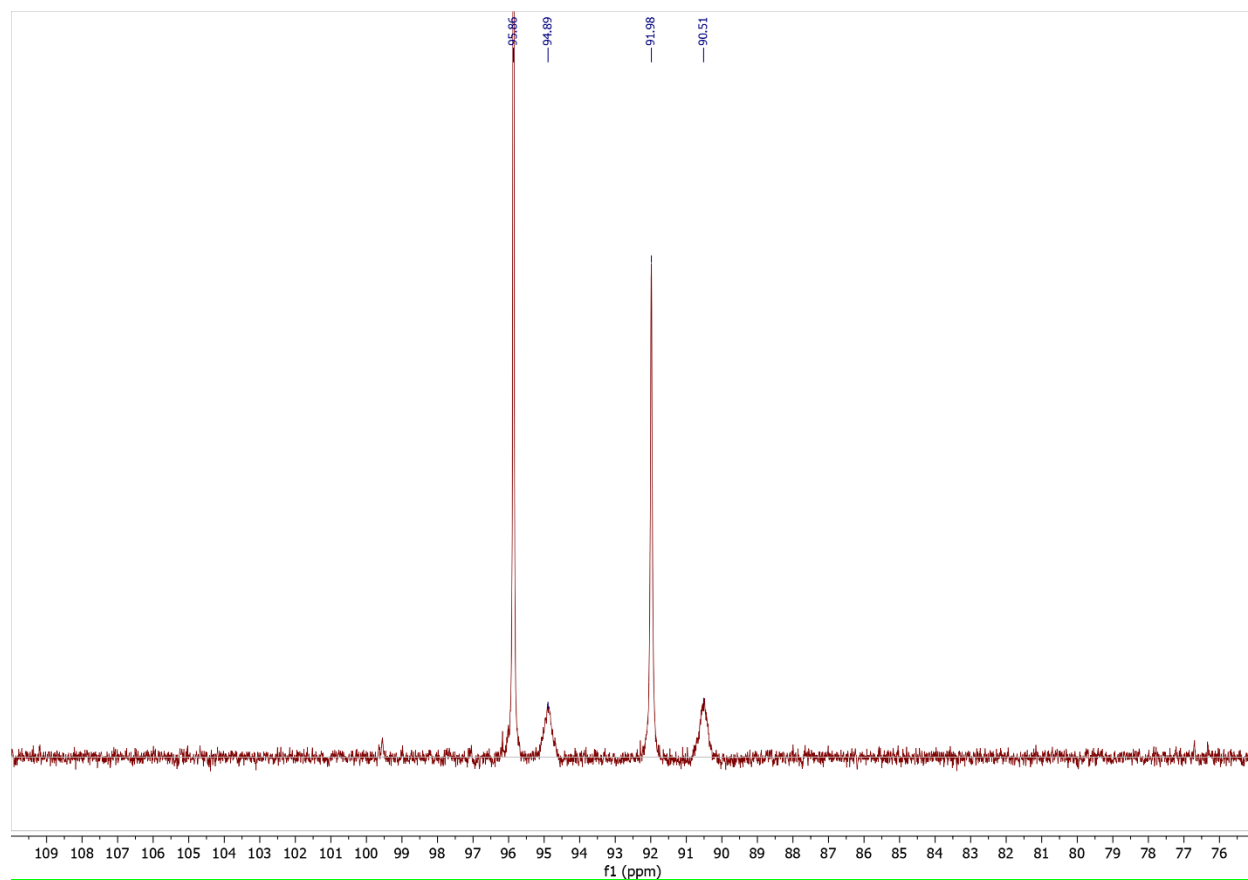

**Figure S4.** <sup>13</sup>C NMR spectrum of 2 mM [1-<sup>13</sup>C]-maltose and 0.6 mM V23L protein in PBS, pH 7.4. From high frequency to low frequency are free β-maltose ( $\delta = 95.86$  ppm), bound β-maltose ( $\delta = 94.89$  ppm), free α-maltose ( $\delta = 91.98$  ppm), and bound α-maltose ( $\delta = 90.51$  ppm). The peak width (FWHM) is 38.0 Hz for bound β-maltose and 39.2 Hz for bound α-maltose.

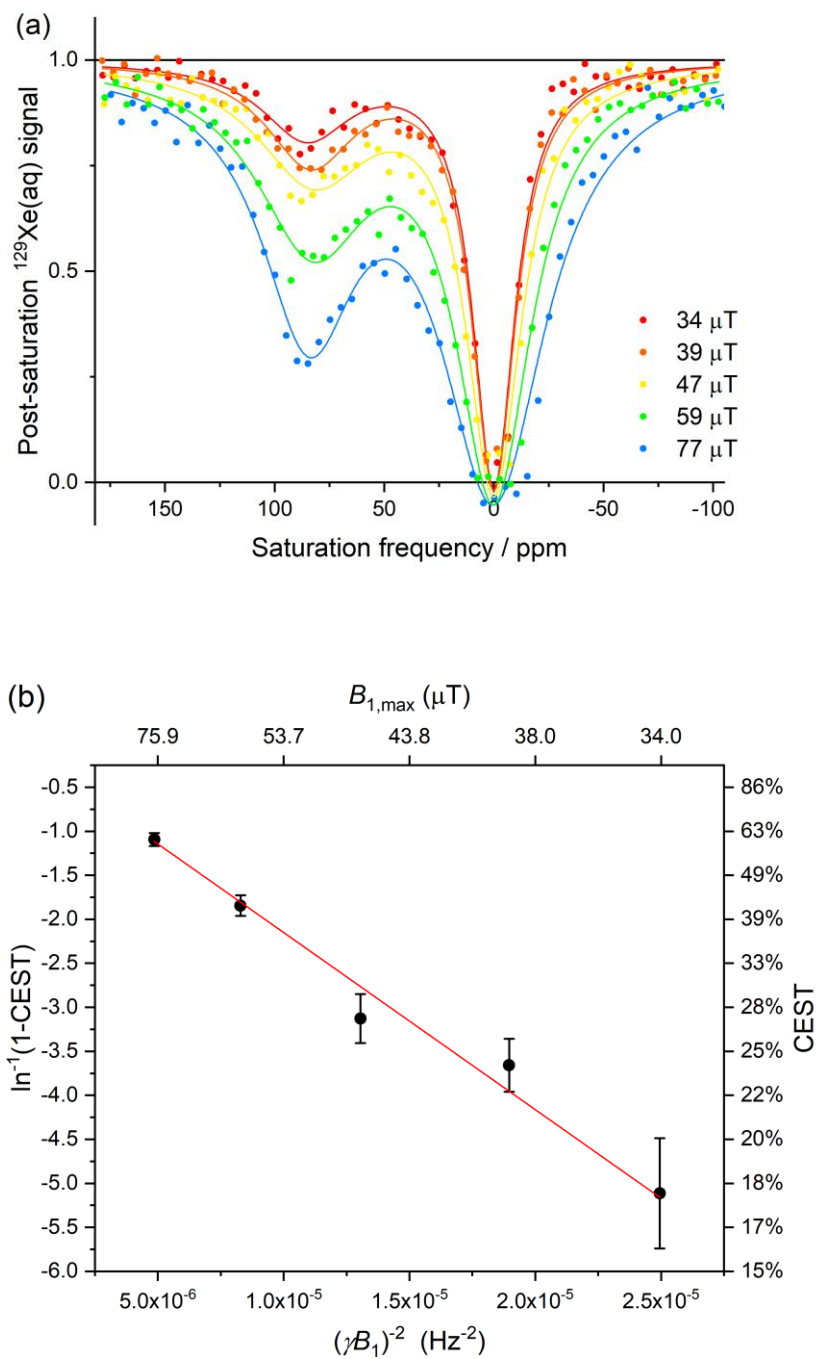

**Figure S5.** (a) Hyper-CEST z-spectra of V23A using a series of saturation pulse strengths at 300 K. (b) Linear fitting of  $\ln^{-1}(1-\text{CEST})$  versus  $(\gamma B_1)^{-2}$  yields the slope =  $(-2.0 \pm 0.2) \times 10^5 \text{ s}^{-2}$ , y-intercept =  $-0.14 \pm 0.12$ , and  $k_{\text{off,Xe}} = (\text{slope}/\text{y-intercept})^{1/2} = (1.2 \pm 0.5) \times 10^3 \text{ s}^{-1}$ .

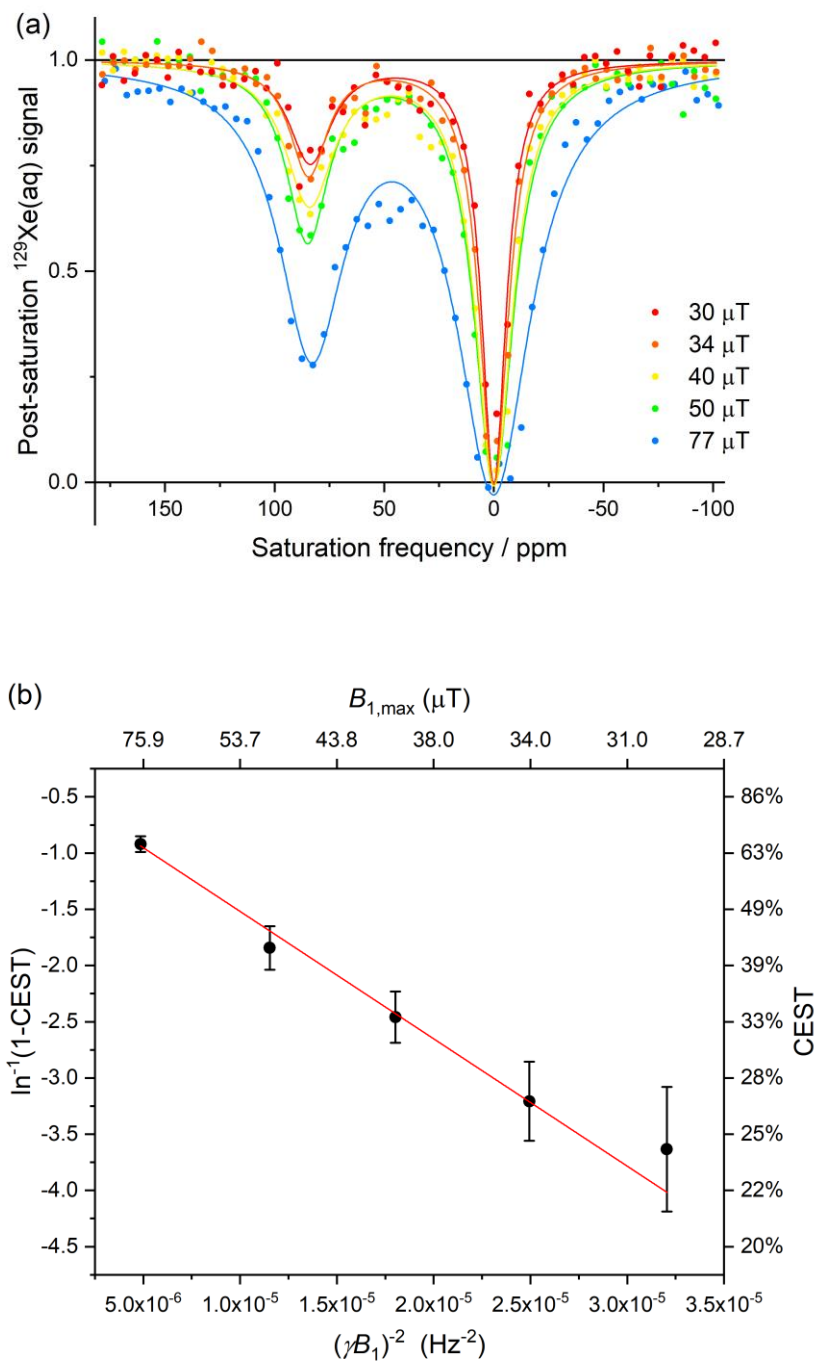

**Figure S6.** (a) Hyper-CEST z-spectra of V23L using a series of saturation pulse strengths at 300 K. (b) Linear fitting of  $\ln^{-1}(1-\text{CEST})$  versus  $(\gamma B_1)^2$  yields the slope =  $(-1.1 \pm 0.1) \times 10^5 \text{ s}^{-2}$ , y-intercept =  $-0.39 \pm 0.06$ , and  $k_{\text{off,Xe}} = (\text{slope}/\text{y-intercept})^{1/2} = (5.4 \pm 0.3) \times 10^2 \text{ s}^{-1}$ .



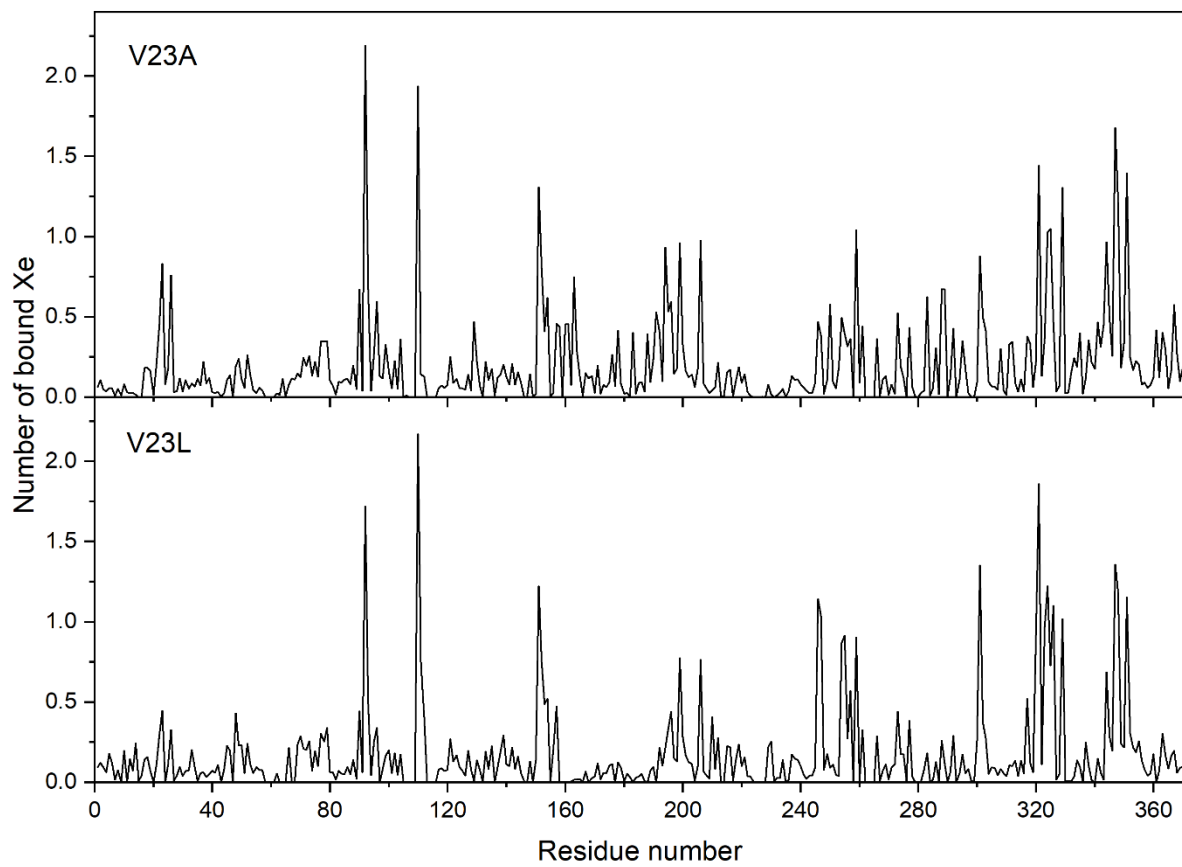

**Figure S7.** Average number of Xe atoms bound to the surface of V23A (top) and V23L (bottom) during the “Xe flooding” simulations.

**Table S1.** Oligonucleotide primers used in MBP site-directed mutagenesis.

---

|           |                |                                            |
|-----------|----------------|--------------------------------------------|
| K15D      | Forward primer | 5' – GATTAACGGCGATGATGGCTATAACGGTC – 3'    |
|           | Reverse primer | 5' – GACCGTTATAGCCATCATCGCCGTTAATC – 3'    |
| D14K/K15D | Forward primer | 5' – CTGGATTAACGGCAAAGATGGCTATAACGGTC – 3' |
|           | Reverse primer | 5' – GACCGTTATAGCCATCTTTGCCGTTAATCCAG – 3' |
| V23A      | Forward primer | 5' – GTCTCGCTGAAGCTGGTAAGAAATTCGAG – 3'    |
|           | Reverse primer | 5' – CTCGAATTTCTTACCAGCTTCAGCGAGAC – 3'    |
| V23L      | Forward primer | 5' – GTCTCGCTGAACTGGGTAAGAAATTCGAG – 3'    |
|           | Reverse primer | 5' – CTCGAATTTCTTACCCAGTTCAGCGAGAC – 3'    |

---
